# Supplementary material for: [(C2H5)3NH]2Cu2(C2O4)3: a three-dimensional metal–oxalato framework showing structurally related dielectric and magnetic transitions at around 165 K
Source: Royal Society of Chemistry journal article supplement (doi:10.1039/c2dt30818e), 2012-01-01
Supplement: c2dt30818e.pdf [file c2dt30818e.pdf]

## Supporting Information

### “[(C<sub>2</sub>H<sub>5</sub>)<sub>3</sub>NH]<sub>2</sub>Cu<sub>2</sub>(C<sub>2</sub>O<sub>4</sub>)<sub>3</sub>: A Three-Dimensional Metal-Oxalato Framework Showing Structural Related Dielectric and Magnetic Transitions at Around 165 K”

by B. Zhang et al

365.7 mg Cu(NO<sub>3</sub>)<sub>2</sub>·2H<sub>2</sub>O (1.6 mmol) was dissolved into 10.0ml H<sub>2</sub>O. Meanwhile, H<sub>2</sub>C<sub>2</sub>O<sub>4</sub>·2H<sub>2</sub>O 376.3 mg (3.0 mmol) was dissolved into 10.0 ml H<sub>2</sub>O, then 604 mg Et<sub>3</sub>N (6.0 mmol) was added. The solution was added into the solution of Cu(NO<sub>3</sub>)<sub>2</sub>. Muddy liquor was obtained. The mixture was filtered and filtrate was remained in room-temperature. Blue-diamond crystal was appeared on the bottom of baker after three weeks. 280.0 mg crystal was collected and washed with water quickly and dried in air. The yield is 63%. Elemental analysis: C<sub>18</sub>H<sub>32</sub>O<sub>12</sub>N<sub>2</sub>Cu<sub>2</sub>, calc. C 36.30, H 5.42, N 4.70; exp. C 36.41, H 5.42, N 4.76. IR on KBr pellet (cm<sup>-1</sup>): 3403(bw), 2976(w), 2938(m), 2739(m), 2678(m), 2491(w), 1672(s), 1639(s), 1606(s), 1457(m), 1417(m), 1361(w), 1289(m), 1171(w), 1035(w), 804(m), 489(m), 412(w).

IR experiment was performed on Bio-rad FTS6000 with KBr pellet. Thermogravimetric analysis was carried out on Shimadzu DTG-60 Analyzer with 10°C/min from room-temperature to 600°C. Powder X-ray diffraction pattern was obtained on a Rigaku RINT2000 diffractometer at room temperature with Cu Kα (λ = 1.54056 Å) radiation in a flat-plate geometry. DSC experiment was performed on a TOLEDO DSC1 STAR with sweeping rate of 10°C/min under nitrogen atmosphere.

A piece of single crystal was selected for X-ray diffraction. Data was collected at 293 K, 180 K, 155 K and 135 K on Nonius Kappa CCD with Mo Kα (λ = 0.71073 Å) radiation.<sup>1</sup> The crystal structure was solved by direct method, hydrogen atoms of ethyl groups and N were found by calculation. All of nonhydrogen atoms were refined anisotropically.<sup>2</sup> The crystallographic data were listed on Table S1. The crystal discussion was performed with data of 135 K. Crystallographic data of **1** at 135 K: C<sub>18</sub>H<sub>32</sub>Cu<sub>2</sub>N<sub>2</sub>O<sub>12</sub>, Mr = 595.54, monoclinic, space group *P* 2<sub>1</sub>/*c*, *a* = 8.6987(1) Å, *b* = 34.1408(4) Å, *c* = 8.6081(1) Å, β = 107.578(1)°, *V* = 2437.07(5) Å<sup>3</sup>, *Z* = 4, *D<sub>C</sub>* = 1.623 g·cm<sup>-3</sup>, μ = 1.808 mm<sup>-1</sup>, 27882

measured data, 5518 unique,  $R_{int} = 0.0368$ .  $R_I = 0.0308$  for 4832 observations of  $I \geq 2\sigma(I_0)$ ,  $wR_2 = 0.0823$  for all data,  $GOF = 1.101$ . CCDC-852903/6.

The dielectric measurements were performed on pellet of compressed crystal at TH2828 from 340 K to 113 K. The voltage is parallel with the thinnest direction of pellet.

Magnetization measurement was performed on polycrystalline sample tightly packed by parafilm inside a capsule on a Quantum Design MPMS 7 System. Magnetic susceptibility data was corrected for the diamagnetism of the sample by Pascal constant ( $-136.5 \times 10^{-6} \text{cm}^3 \text{mol}^{-1}$  per Cu), parafilm and capsule.<sup>3</sup>

Reference:

1. Otwinowski & Minor, *Denzo and Scalpack*, 1997.
2. G. M. Sheldrick, University of Göttingen, Göttingen(Germany), *SHELX-97*, 1997.
3. O. Kahn, *Molecular Magnetism*; John Wiley & Sons Inc., New York, 1993.

**Table S1.** Crystallographic data of **1** at 293K, 180 K, 155 K and 135 K

| T, K                                                        | 293                                | 180                                | 155                                | 135                                |
|-------------------------------------------------------------|------------------------------------|------------------------------------|------------------------------------|------------------------------------|
| Cell parameters                                             |                                    |                                    |                                    |                                    |
| <i>a</i> , Å                                                | 8.8294(1)                          | 8.7407(1)                          | 8.7156(1)                          | 8.6987(1)                          |
| <i>b</i> , Å                                                | 33.7719(4)                         | 33.9886(4)                         | 34.0813(4)                         | 34.1408(4)                         |
| <i>c</i> , Å                                                | 8.8052(1)                          | 8.6771(1)                          | 8.6360(1)                          | 8.6081(1)                          |
| $\beta$ , °                                                 | 107.901(1)                         | 107.725(1)                         | 107.632(1)                         | 107.578(1)                         |
| <i>V</i> , Å <sup>3</sup>                                   | 2498.48(5)                         | 2455.46(5)                         | 2444.22(5)                         | 2437.07(5)                         |
| Space group                                                 | <i>P</i> 2 <sub>1</sub> / <i>c</i> |
| <i>T</i> <sub>min.</sub> , <i>T</i> <sub>max.</sub> ,       | 0.582, 0.683                       | 0.576, 0.682                       | 0.590, 0.681                       | 0.584, 0.680                       |
| $\theta$ <sub>min.</sub> , $\theta$ <sub>max.</sub> , °     | 0.987, 27.51                       | 0.984, 27.52                       | 0.979, 27.54                       | 0.982, 27.54                       |
| Completeness, %                                             | 98.7                               | 98.4                               | 97.9                               | 98.2                               |
| No. total reflns.                                           | 30048                              | 28663                              | 28252                              | 27882                              |
| No. unique reflns. ( <i>R</i> <sub>int</sub> )              | 5699(0.0422)                       | 5569(0.0394)                       | 5535(0.0284)                       | 5518(0.0268)                       |
| No. obs. [ $I \geq 2\sigma(I_0)$ ]                          | 3688                               | 4523                               | 4667                               | 4832                               |
| No. params.                                                 | 340                                | 332                                | 340                                | 319                                |
| Exti.                                                       | 0.0036(5)                          | 0.0025(4)                          | 0.0026(4)                          | 0.0026(4)                          |
| <i>R</i> , <i>wR</i> <sub>2</sub> ( $I \geq 2\sigma(I_0)$ ) | 0.0325, 0.0893                     | 0.0321, 0.0842                     | 0.0299, 0.0775                     | 0.0308, 0.0802                     |
| <i>R</i> , <i>wR</i> <sub>2</sub> (all data)                | 0.0593, 0.0965                     | 0.0436, 0.0885                     | 0.0394, 0.0807                     | 0.0371, 0.0823                     |
| GOF                                                         | 1.071                              | 0.980                              | 1.075                              | 1.101                              |
| $\Delta\rho$ , e/Å <sup>3</sup>                             | 0.337(-0.265)                      | 0.540(-0.421)                      | 0.420(-0.332)                      | 0.815(-0.373)                      |
| Max. and mean $\Delta/\sigma$                               | 0.001/0.000                        | 0.001/0.000                        | 0.001, 0.000                       | 0.001, 0.000                       |
| CCDC                                                        | 852906                             | 852905                             | 852904                             | 852903                             |

**Table S2.** Hydrogen bonds in **1** at 135 K, 155 K, 180 K and 293 K.

| T, K | Donor–H...Acceptor | D–H<br>Å | H...A<br>Å | D...A<br>Å | D–H...A<br>° |
|------|--------------------|----------|------------|------------|--------------|
| 135  | N(1)–H(1) ...O(9)  | 0.93     | 1.87       | 2.789(2)   | 170          |
|      | N(2)–H(2) ...O(5)  | 0.93     | 1.84       | 2.763(2)   | 170          |
| 155  | N(1)–H(11) ...O(9) | 0.93     | 1.87       | 2.789(2)   | 170          |
|      | N(2)–H(2) ...O(5)  | 0.93     | 1.84       | 2.762(2)   | 169          |
| 180  | N(1)–H(1) ...O(9)  | 0.93     | 1.86       | 2.786(2)   | 170          |
|      | N(2)–H(2) ...O(5)  | 0.93     | 1.85       | 2.768(3)   | 169          |
| 293  | N(1)–H(1) ...O(9)  | 0.91     | 1.90       | 2.789(2)   | 166          |
|      | N(2)–H(2) ...O(5)  | 0.91     | 1.89       | 2.784(3)   | 166          |

**Table S3.** Cu–O bond distance (Å) of **1** at different temperatures.

| T, K        | 293                | 180                | 155                | 135                |
|-------------|--------------------|--------------------|--------------------|--------------------|
| Cu1–O,<br>Å | 1.985(2), 1.993(2) | 1.964(2), 1.978(2) | 1.957(2), 1.975(2) | 1.956(2), 1.975(1) |
|             | 2.064(2), 2.083(2) | 2.029(2), 2.004(2) | 2.107(2), 2.023(1) | 2.003(1), 2.006(1) |
|             | 2.148(2), 2.148(2) | 2.190(2), 2.271(2) | 2.209(1), 2.304(2) | 2.221(1), 2.321(2) |
| Cu2–O,<br>Å | 1.974(2), 1.988(2) | 1.960(2), 1.987(2) | 1.957(1), 1.989(1) | 1.956(1), 1.989(1) |
|             | 2.070(2), 2.086(2) | 2.031(2), 2.034(2) | 2.010(2), 2.014(2) | 1.993(1), 1.998(2) |
|             | 2.170(2), 2.202(2) | 2.214(2), 2.258(2) | 2.239(4), 2.293(2) | 2.253(2), 2.311(2) |

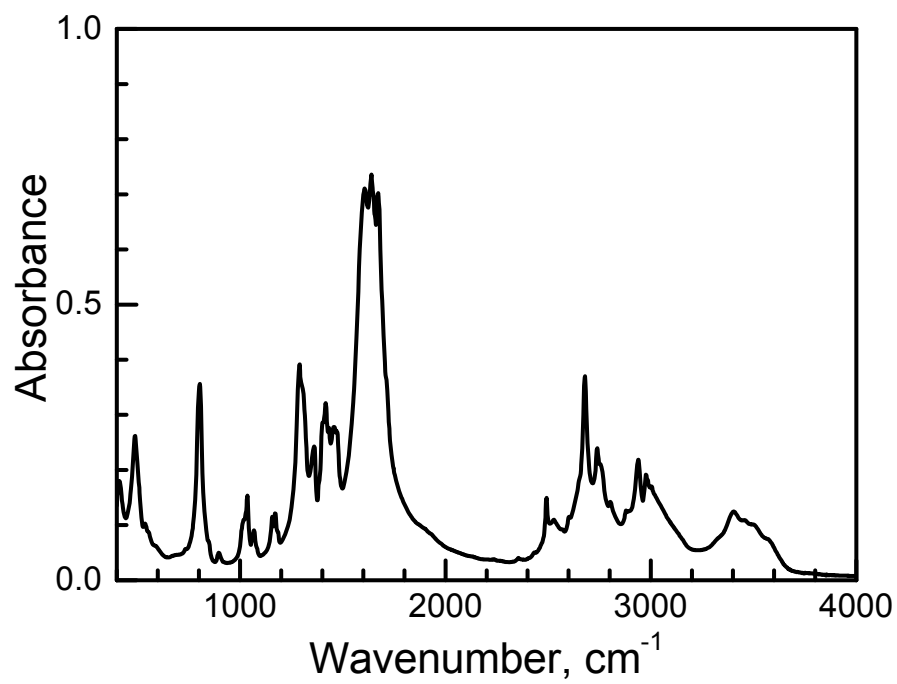

**Figure S1.** IR spectra of **1** at room-temperature.

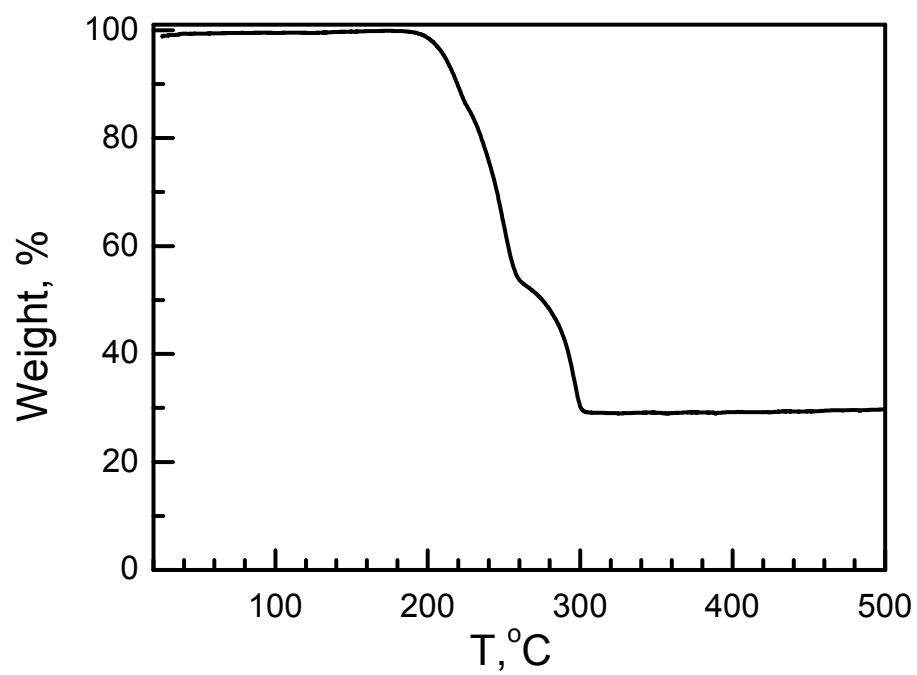

**Figure S2.** TGA plot of **1** with 10°C/min..

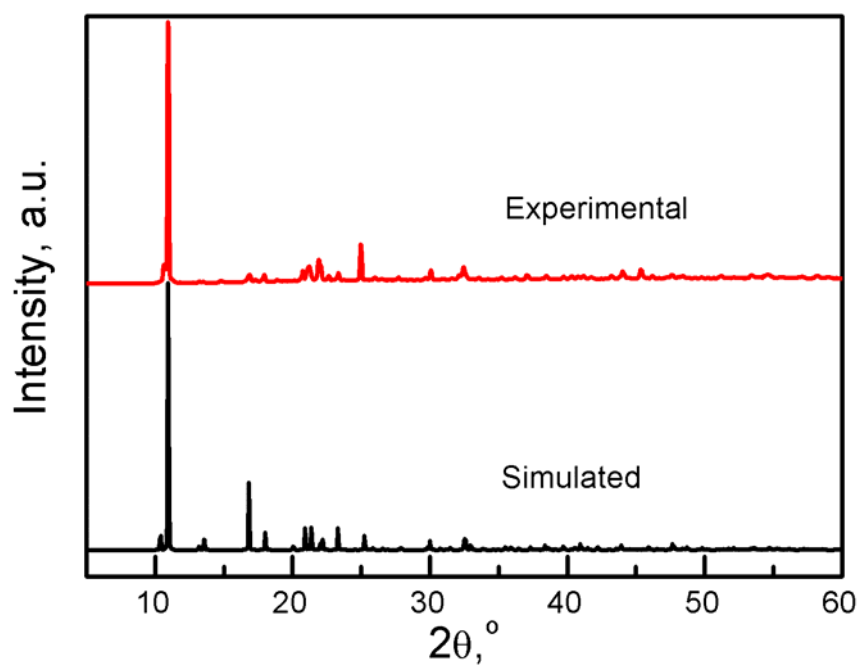

**Figure S3.** X-ray powder diffraction pattern of **1** at room-temperature.

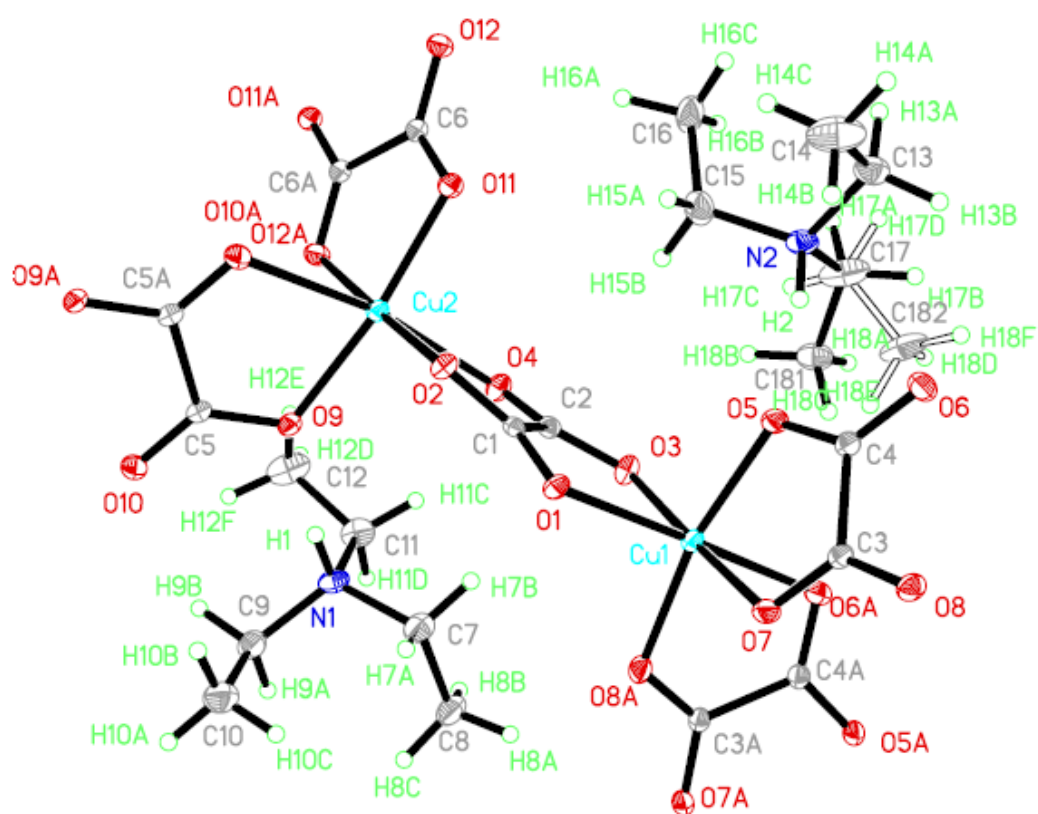

**Figure S4.** ORTEP drawing of **1** with 30% ellipsoid at 135 K.



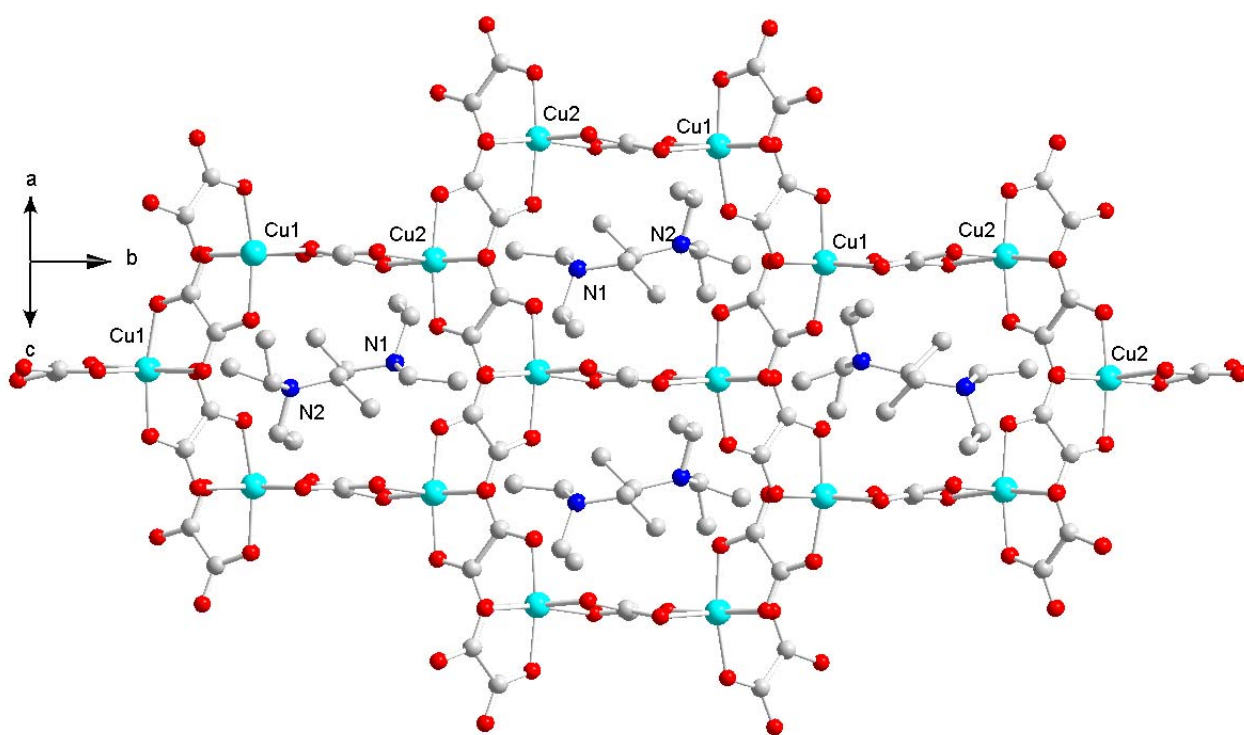

**Figure S5.** Three-dimensional network of anion  $[\text{Cu}_2(\text{C}_2\text{O}_4)_3]_n^{2-}$  viewed along  $[101]$  at 135 K. H atoms were omitted for clarity. Colour code: Cu blue, C grey, O red, N, blue.

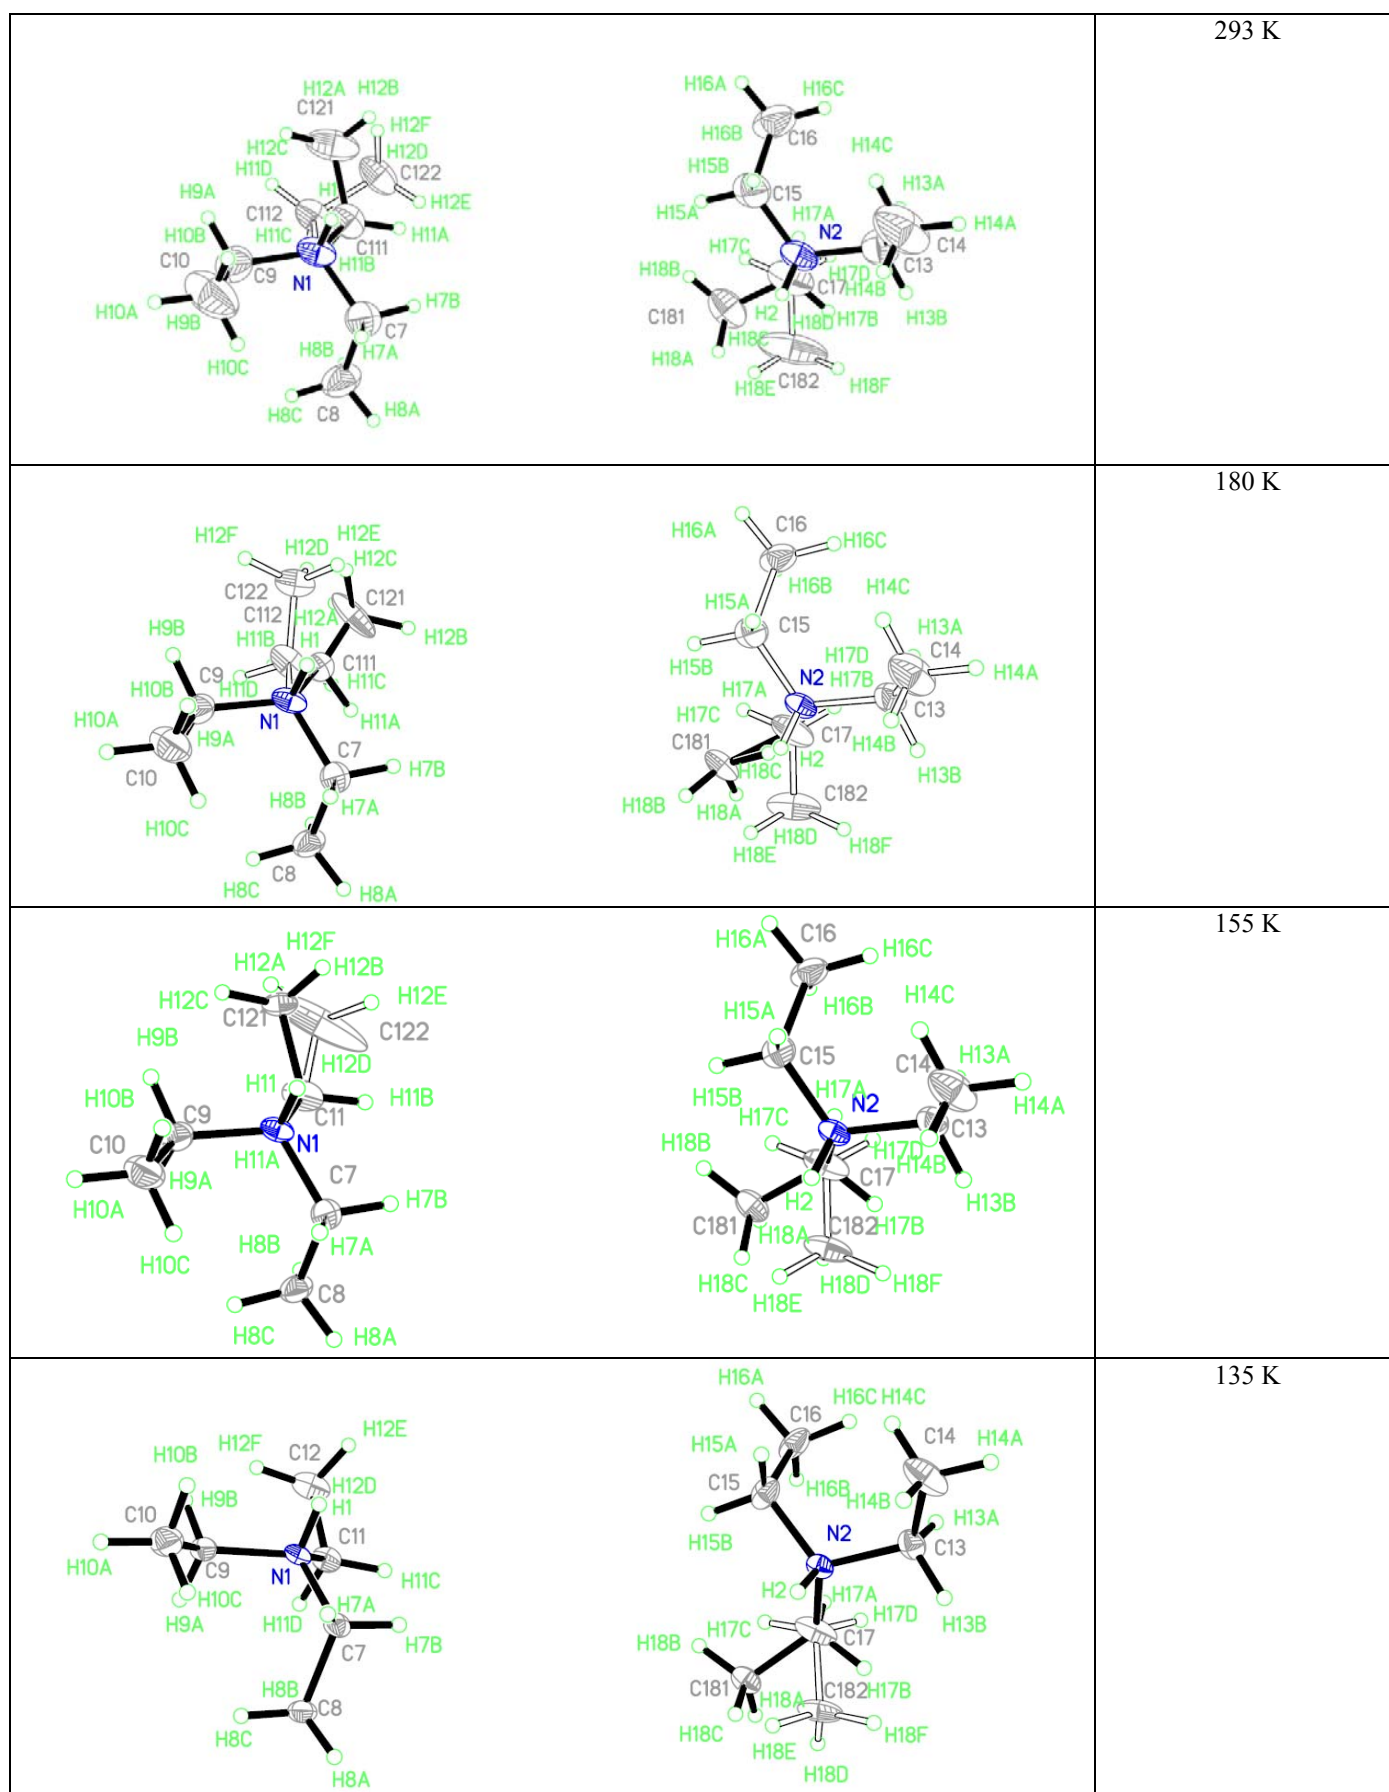

Figure S6. Cations with labels at different temperatures.

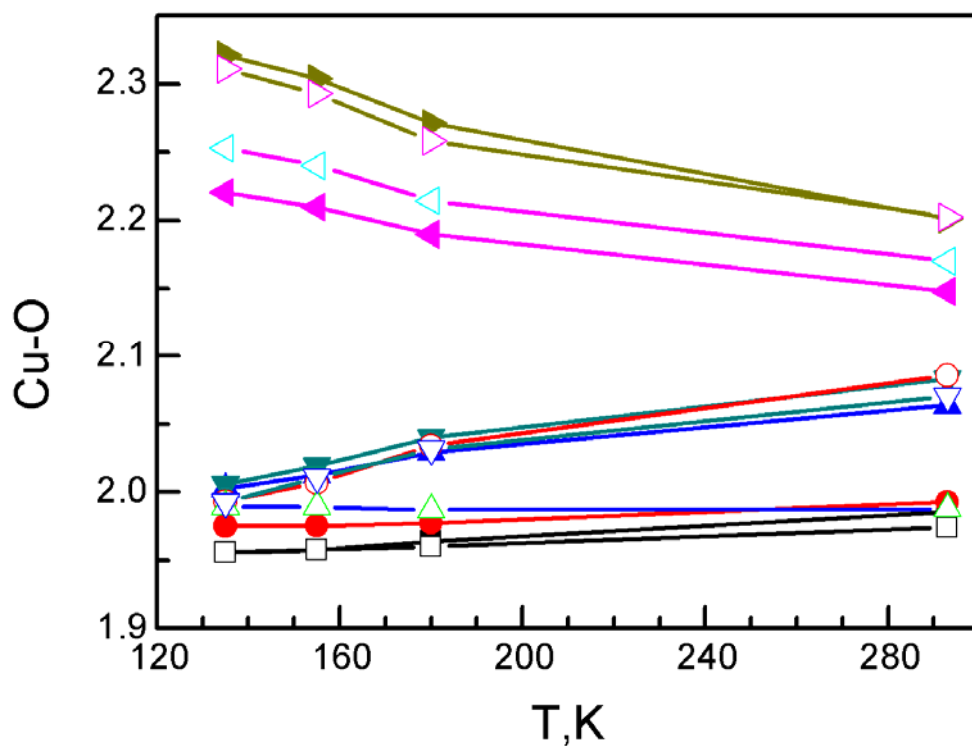

**Figure S7.** Temperature-dependent Cu–O bond distance in **1** (Cu1, solid; Cu2, empty). Top two are Cu–O distances on axial direction, bottom four are Cu–O distances in the equatorial plane.

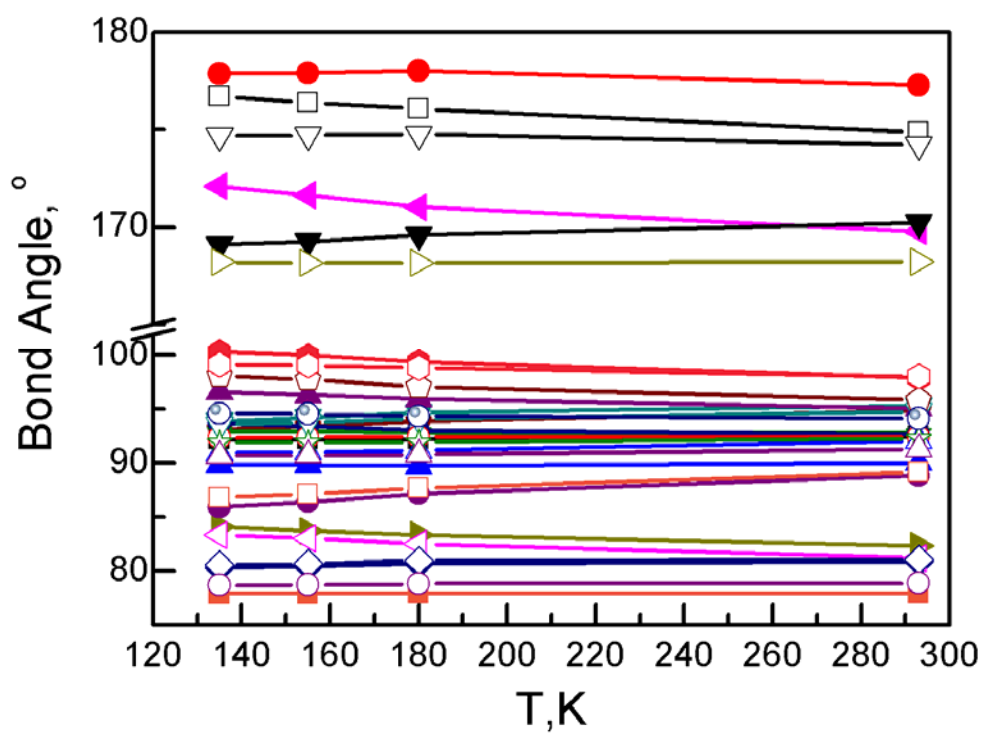

**Figure S8.** Temperature-dependent O–Cu–O angles in **1** (Cu1, solid; Cu2, empty).

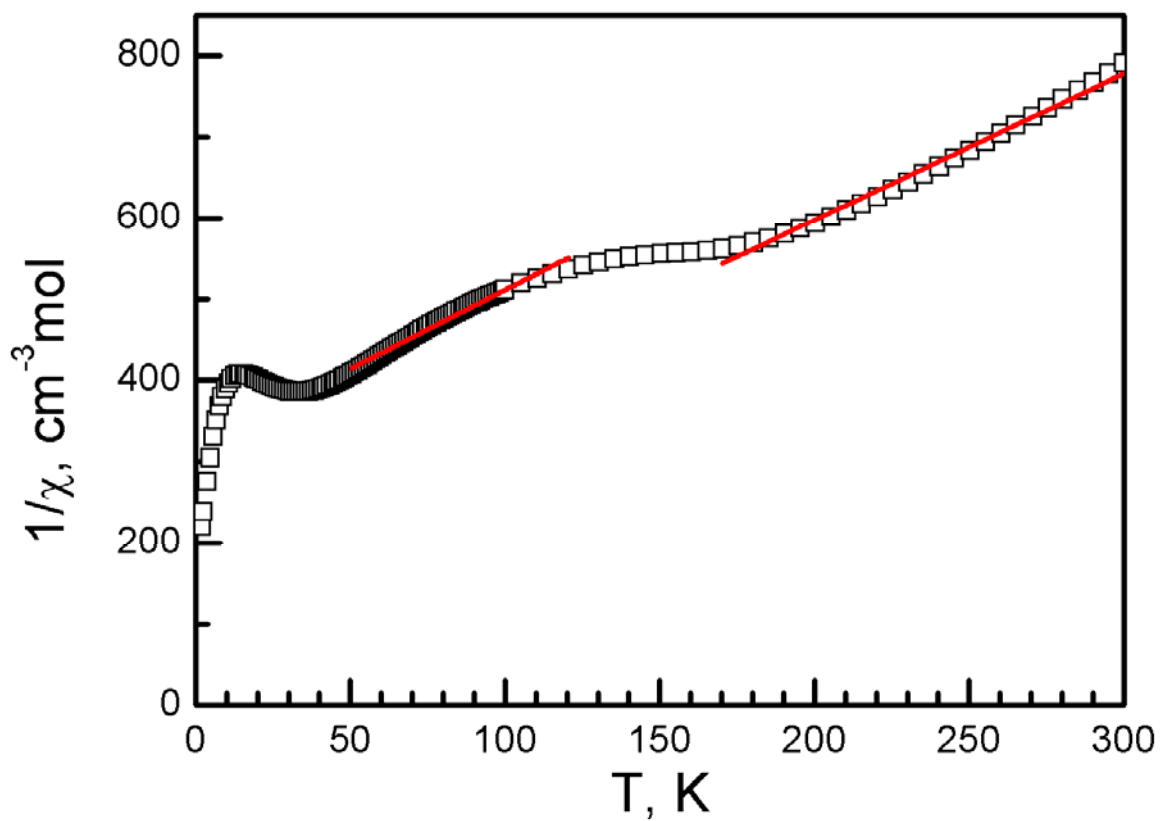

**Figure S9.**  $1/\chi$ -vs- $T$  (black square) plot and Curie-Weiss fitting (red solid) between 50-120K, and 170K~300K.
